# Solving Anscombe's Quartet using a Transfer Learning Approach

Kevin Bu<sup>1</sup> and Jose Clemente<sup>1,2</sup>

1. Department of Genetics and Data Science. Graduate School of Biomedical Sciences at the Icahn School of Medicine at Mount Sinai. 1 Gustave L. Levy Pl, New York, NY 10029.

**Emails:** kevin.bu@icahn.mssm.edu, jose.clemente@mssm.edu

ORCID: 0000-0002-9030-8062 (Kevin Bu)

2. To whom correspondence may be addressed. Email: jose.clemente@mssm.edu

## **Classification**

PHYSICAL SCIENCES: Statistics

## **Keywords**

Anscombe's Quartet, transfer learning, correlation analysis

## **Author Contributions**

K.B. and J.C. designed and performed research, J.C. contributed data, K.B. analyzed data; K.B. and J.C. wrote the paper.

## **This PDF file includes:**

Abstract  
Main Text  
Figure Legends 1, 2, 3

## 1 **Abstract**

2

3 Analysis of high-dimensional datasets often involves usage of summary statistics, one of  
4 which is the correlation coefficient. These values are then used to inform downstream analysis,  
5 whether in feature selection or in subsequent construction of networks and heatmaps.  
6 Condensing pairwise scatterplots into these singular values however, often results in a loss of  
7 information. Originally proposed by F. J. Anscombe in his famous ‘Anscombe’s Quartet,’ this  
8 phenomenon has been canonically used to demonstrate the importance of plotting and the  
9 limitations of summary statistics such as correlation or variance [F.J. Anscombe, (1973) *American*  
10 *Statistician*. 27 (1), 17-21]. While numerous methods exist for the generation of visually distinct  
11 datasets that share similar summary statistics, the converse has not been extensively studied. To  
12 address this gap, we propose ICLUST (Image CLUSTering), an image classifier tool that can  
13 visually distinguish correlations with similar summary statistics in simulations and identify  
14 meaningful clusters in real data. Such a tool can potentially benefit those performing exploratory  
15 analysis or feature selection in a complementary fashion by identifying relationships between  
16 variables that traditional summary metrics cannot provide.

17

18

## 19 **Significance Statement**

20

21 Distilling large-scale, multidimensional datasets via analysis of pairwise relationships  
22 often employs a single value to describe the relationship between variables. However, as  
23 demonstrated through simulations, such summarization fails to retain the nuances of the data.  
24 Characteristics such as the type of relationship (linear versus nonlinear, etc.) and the spread of  
25 the data are commonly lost when using correlations. Here we propose a transfer learning  
26 framework, borrowing from image clustering and classification software, to visually classify  
27 graphs. We apply our method towards separation of scatterplots with similar correlation statistics

28 but visually distinctive patterns in both simulations and real data, demonstrating its broad  
29 applicability.

30

31

32 **Main Text**

33

34 **Introduction**

35

36 Exploratory analysis of large multidimensional datasets often relies on summary statistics  
37 such as correlation coefficients for the construction of networks and heatmaps. However, the  
38 usage of such summary statistics results in the loss of information encoded in the scatterplots of  
39 pairwise relationships. Anscombe's quartet has canonically been used to illustrate the  
40 importance of graphing and the limitations of summary statistics such as correlation or variance -  
41 Anscombe himself stated, "make both calculations and graphs. Both sorts of output should be  
42 studied; each will contribute to understanding" [1]. This is especially critical in biological fields as  
43 Pearson and Spearman correlation are the default analytical tools when performing exploratory  
44 analysis in the gene expression and microbiome domains respectively [2-4].

45 Several methods have been developed to generate these kinds of datasets, analogous to  
46 Anscombe's Quartet. The Datasaurus is one such dataset, generated using either a genetic  
47 algorithm or a simulated annealing method [5, 6]. However, there is a lack of tools that can  
48 separate these plots once they have been generated. Even the more modern exploratory data  
49 analysis tools still collapse pairwise relationships into summary statistics such as the s-Corrplot  
50 package or the MIC, which like Spearman, only quantifies strength of relationship without  
51 specifying the nature of that association [7, 8]

52 Here we propose ICLUST, a tool that employs transfer learning based on the pre-trained  
53 VGG16 convolutional neural network. Although the model had been trained to distinguish images  
54 of cats and dogs, by extracting the last layer of the network (4096 features), we can use the pre-

55 trained weights to distinguish images of plotted pairwise correlations in an automated fashion,  
56 thus seeking to find 'visual' similarities in a way that would be impossible manually. We apply this  
57 tool to the separation of pairwise correlations from simulations and real data with the hypothesis  
58 that ICLUST can visually distinguish correlations with similar summary statistics (with  
59 performance inversely proportional to noise) and identify clusters in real data, some of which  
60 would have been masked by using correlation coefficients alone as a clustering criterion.

61

62

## 63 **Results**

64

65 We first applied ICLUST to Anscombe's quartet, taking the original data and adding to  
66 each point a specified amount of noise according to a bivariate normal distribution. Five plots  
67 were created for each class at each level of noise; the resulting set of images was then passed  
68 through ICLUST and the PCA plots are shown in **Fig. 1a**. A v-measure score (VMS) for each  
69 level of noise was computed to quantitatively assess the quality of clustering in accordance with  
70 the true labels. VMS as a function of noise (orange) is shown in **Fig. 1b** with error bars reflecting  
71 the standard deviation over one hundred such trials. The baseline for comparison (shown in blue)  
72 is the VMS obtained using clustering based on distances of the Pearson correlation summary  
73 statistic alone. Consistent with our hypothesis, increasing the level of noise reduces the accuracy  
74 of clustering as plot classes begin to overlap upon visual examination (**Fig. 1c**).

75 Given the relative efficacy of ICLUST on distinguishing clusters in canonical simulated  
76 data, we tested whether or not ICLUST could identify distinct clusters in real data. We applied  
77 ICLUST to data obtained from the WHO on a variety of health statistics for each country by  
78 computing pairwise correlations between all variables and arbitrarily choosing a window of  
79 Pearson correlation values in which to examine scatterplots. By doing so, we emulate the  
80 simulation approach described earlier, generating a dataset with similar values but potentially  
81 differing shapes and relationships. Here, we arbitrarily choose a window of correlation magnitude

82 and select all correlations with Pearson's  $r$  with a magnitude between 0.8975 to 0.9025.  
83 Hierarchical clustering based on Euclidean distance between correlation strength yields the  
84 dendrogram in **Figure 2a**, while clustering using ICLUST 4096-component feature vectors yields  
85 the structure in **Figure 2b**. Clustering assignment was determined by the best silhouette score,  
86 which corresponded to  $k = 2$  clusters. The average image of the scatterplots in clusters 1 (red)  
87 and 2 (teal) are shown for correlation strength-based clustering and ICLUST in **Figure 2c** and  
88 **Figure 2d**, respectively. The PCA plot obtained based on Euclidean distance of the image  
89 fingerprints is shown in **Figure 2e**. Notably, variables that fall in cluster 1 tend to be normalized  
90 rates (e.g. immunization per 1000), while variables that fall in cluster 2 tend to be less uniformly  
91 distributed because of the presence of outliers. An example of this is population of a country, as  
92 countries such as India and China that are expected to be outliers skew the distribution.

93 We then applied ICLUST to an airline delays dataset, containing various metrics for  
94 flights (such as time spent taxiing). In this dataset, we can not only distinguish visual differences  
95 in shape (across a variety of correlation strengths, from  $r = 0$  to  $r = 1$ ) but also observe  
96 correlations that share similar correlation coefficients but distinct visual structure. When  
97 performing clustering analysis, the algorithm chooses  $k = 2$  as the best silhouette score both  
98 when using correlation strength (**Fig. 3a**) or image fingerprints (**Fig. 3b**). The average image  
99 corresponding to these clusters for correlation strength and image fingerprints are shown in  
100 **Figure 23** and **Figure 3d** respectively. In **Figure 3c**, cluster 1 corresponds to the teal cluster in  
101 **Figure 3a** while and cluster 2 corresponds to the red cluster. In **Figure 3d**, Cluster 1 is the teal  
102 portion of the dendrogram in **Figure 3b**. The PCA plot of these clusters based on the neural  
103 network fingerprints is shown in **Figure 3e**. , correlations with similar strength can appear  
104 drastically different, while correlations with different strength can appear more similar (**Fig. 3f-g**).  
105 Thus with both real examples and simulation, we demonstrate how Anscombe's observation is  
106 indeed applicable to real world settings and that ICLUST can both separate visually distinct  
107 graphs that share summary statistics and cluster similar graphs with different correlation  
108 coefficients.

109

110

## 111 **Discussion**

112

113           Given the prevalent usage of summary statistics in constructing models, networks, and  
114 other meaningful representations of data, we propose a transfer learning based image-clustering  
115 approach to the separation of scatterplots. Through simulations of Anscombe's Quartet as well as  
116 representative real datasets (WHO, airline), we demonstrate the efficacy of ICLUST in identifying  
117 clusters of distinct patterns where summary statistics would otherwise fail to do so. Going  
118 forward, ICLUST can aid in exploratory data analysis in a complementary fashion to traditional  
119 methods, in a way consistent with Anscombe's axiom of combining both graphs and calculations  
120 to arrive at the most accurate representation of data.

121

122

## 123 **Methods**

124

### 125 Plotting Simulated Data

126 Bivariate independent uniform displacement was added to Anscombe's Quartet in the following  
127 manner. Let  $(x_i, y_i)$  be a datapoint from the dataset. We define  $\sigma_{max} \in \{0.1, 0.25, 0.5, 0.75, 1\}$ ;  
128 values were arbitrarily chosen to yield a representative range of noises. A new simulated dataset  
129 for each  $\sigma_{max}$  was generated by computing  $[x_i + e_1, y_i + e_2]$  where  $e_1, e_2 \sim Unif(0, \sigma_{max})$  for each  
130 dataset. Python's Matplotlib and Seaborn libraries with were used to construct plots. Opacity of  
131 points was set to alpha = 0.1 such that overlapping points were treated differently when plotted.  
132 The default sns.heatmap function was used with palette='set1' and default marker size=36,  
133 shape='o'. The origin of each plot was fixed at the center of the coordinate axes (which is  
134 hidden). The scales of the plots are allowed to vary per default plotting parameters and the  
135 method is thus scale invariant. For each set of parameters, 100 simulations were generated. Note

136 that images shown in Fig. 1. are enlarged and include the axes for better visibility; however the  
137 clustering analysis was performed on the raw images.

138

139

#### 140 Evaluating Performance on Simulation Data

141 An unweighted v-measure score (VMS) was used to assess the performance of ICLUST on the  
142 labeled simulated data, as defined by:

143

$$VMS = \frac{2(Homogeneity * Completeness)}{Homogeneity + Completeness}$$

144 Where homogeneity is defined as:

$$Homogeneity = 1 - \frac{H(C|K)}{H(C)}$$

145 where

$$H(C|K) = - \sum_{c,k} \frac{n_{ck}}{N} \log \left( \frac{n_{ck}}{n_k} \right)$$

146

$$H(C) = - \sum_c \frac{\sum_k n_{ck}}{C} \log \left( \frac{\sum_k n_{ck}}{C} \right)$$

147 And completeness is defined as:

$$Completeness = 1 - \frac{H(K|C)}{H(K)}$$

148 Where

$$H(K|C) = - \sum_{c,k} \frac{n_{ck}}{N} \log \left( \frac{n_{ck}}{n_c} \right)$$

$$H(K) = - \sum_k \frac{\sum_c n_{ck}}{C} \log \left( \frac{\sum_c n_{ck}}{C} \right)$$

149 Where N is the total number of points, C is the total number of labels, and  $n_c, n_k, n_{ck}$  represent the  
150 number of elements with true label C, in cluster K, and in cluster K with label C, respectively.

151

152 This is a generalization of the weighted VMS, given by:

$$V_{\beta} = \frac{(1 + \beta)hc}{\beta h + c}$$

153 Where  $\beta$  scales the VMS by a weighting towards homogeneity; here we set  $\beta = 1$ .

154

155

#### 156 Plotting WHO and Airline Delay Data

157 For real-world datasets, Python's Matplotlib and Seaborn libraries were used to construct  
158 scatterplots. Opacity of points was set to alpha = 0.1 such that overlapping points were treated  
159 differently when plotted. The default sns.Implot function was used with palette='set1' and default  
160 marker size=36, shape='o'. The upper and lower bounds for the x and y axes are dynamic and  
161 vary on a scatterplot by scatterplot basis, thus using the default parameters for determination of  
162 scaling and display. All correlations with a Pearson's r between 0.8975 and 0.9025 in magnitude  
163 were plotted, yielding n = 51 scatterplots. The window was chosen based on a range likely to  
164 contain various shapes as described by Anscombe's Quartet. Two plots were removed from the  
165 WHO dataset as outliers (identified via initial PCA), resulting in 49 plots. The outliers were  
166 removed to best demonstrate the two distinct clusters; visually, the outliers appeared distinct from  
167 the other plots consistent with ICLUST's ability to distinguish visual differences between  
168 scatterplots. For the airline data, all scatterplots were plotted in the dataset (n = 80 scatterplots).  
169 WHO data and airline delay data were obtained from sources [8] and [9] respectively.

170

171

#### 172 Image Classification, Transfer Learning and Image Clustering

173 Image classification in ICLUST uses the VGG16 model, a convolutional neural network trained on  
174 the ImageNet dataset [10]. Briefly, input images (.PDFs, .PNGs, etc.) are scaled via the keras PIL  
175 image library which converts them into VGG16 inputs i.e. RGB (3-channel) images, each of  
176 dimensions 224 x 224 pixels. With each successive layer of the network, these pixels are



177 converted into features using pre-trained functions. Instead of using the original output layer  
178 however, in a transfer learning setting, we adopt the penultimate layer (4096 features) as the  
179 feature map for our problem and use these as fingerprints for each image. Unsupervised  
180 clustering is performed using UPGMA after calculating the Euclidean distance between feature  
181 vectors corresponding to each image. Silhouette score is computed for each possible number of  
182 clusters, iterating from 2 through max\_clust (default=10). Code for image processing and transfer  
183 learning were obtained from an open-source GitHub repository (see acknowledgements). The  
184 software was adapted from an earlier version and streamlined for use with the addition of new  
185 functionality such as concatenation of images, creation of dendrograms, generation of average  
186 images, and clustering based off of silhouette score. The average image for a given cluster is  
187 obtained by averaging the pixel intensities across the entire image for all members in the cluster.  
188 If the true class labels are given, clustering accuracy is assessed using VMS; otherwise,  
189 unsupervised clustering is performed in which the program iterates through cluster numbers  
190 (default range is 2-20) with the cluster number chosen based on the k that yields the highest  
191 silhouette score. All raw data and code used to generate analysis and figures are located at  
192 <https://github.com/kbpi314/ICLUST>.

193

194

## 195 **Acknowledgments**

196

197 The inspiration for the software choice and architecture came from the following open-source  
198 GitHub repository by Steve Schmerler (<https://github.com/elcorto/imagecluster>).

199

200

## 201 **References**

- 202 1. Anscombe, F.J., *Graphs in Statistical Analysis*. The American Statistician, 1973. **27**(1): p.  
203 17-21.

- 204 2. Langfelder, P. and S. Horvath, *WGCNA: an R package for weighted correlation network*  
205 *analysis*. BMC Bioinformatics, 2008. **9**: p. 559.
- 206 3. Song, W.M. and B. Zhang, *Multiscale Embedded Gene Co-expression Network Analysis*.  
207 PLoS Comput Biol, 2015. **11**(11): p. e1004574.
- 208 4. Caporaso, J.G., et al., *QIIME allows analysis of high-throughput community sequencing*  
209 *data*. Nat Methods, 2010. **7**(5): p. 335-6.
- 210 5. Matejka, J. and G. Fitzmaurice, *Same Stats, Different Graphs*, in *Proceedings of the*  
211 *2017 CHI Conference on Human Factors in Computing Systems - CHI '17*. 2017. p.  
212 1290-1294.
- 213 6. Chatterjee, S. and A. Firat, *Generating Data with Identical Statistics but Dissimilar*  
214 *Graphics*. The American Statistician, 2007. **61**(3): p. 248-254.
- 215 7. McKenna, S., et al., *s-CorrPlot: an interactive scatterplot for exploring correlation*. Journal  
216 of Computational and Graphical Statistics, 2016. **25**(2): p. 445-463.
- 217 8. Reshef, D.N., et al., *Detecting novel associations in large data sets*. Science, 2011.  
218 **334**(6062): p. 1518-24.
- 219 9. Wickham, H. *ASA Sections on Statistical Computing*. 2018 June 23, 2020]; Available  
220 from: <http://stat-computing.org/dataexpo/2009/the-data.html>.
- 221 10. Simonyan, K. and A. Zisserman, *Very Deep Convolutional Networks for Large-Scale*  
222 *Image Recognition* International Conference on Learning Representations, 2015.

223

224

## 225 **Figure Legends**

226

227 **Fig. 1.** ICLUST can resolve Anscombe's Quartet. (A) Principal coordinate analysis (PCA) plots  
228 (with PCA computed on the transfer learning features) at varying noise levels where points  
229 represent images of scatterplots derived from Anscombe's quartet with the addition of noise. (B)  
230 V-measure score (VMS) as a function of noise level for the clustering structure in Anscombe's

231 Quartet (obtained via cutting the hierarchical clustering tree at  $k = 4$ ). (C) Examples of how the  
232 plots become distorted as noise levels increase.

233

234 **Fig. 2.** ICLUST identifies distinct clustering in WHO data. A subset of scatterplots were obtained  
235 by selecting all pairwise correlations in the WHO dataset with Pearson correlation between  
236 0.8975 and 0.9025, with two outlier plots removed. Clustering assignment was determined by  
237 selecting the number of clusters with the highest silhouette score. (A) Dendrogram obtained by  
238 hierarchical clustering of scatterplots based on correlation strength alone. (B) Dendrogram  
239 obtained by hierarchical clustering of scatterplots based on Euclidean distance between 4096-  
240 component feature vectors of the images as processed by ICLUST. (C) Average image in each  
241 cluster as determined by correlation strength-based clustering, corresponding to the dendrogram  
242 in (A). (D) Average image in each cluster according to visual similarity clustering via ICLUST. (E).  
243 Principal Coordinate Analysis (PCA) of the scatterplots based on the 4096-component feature  
244 vector for each image with colors pertaining to the clustering obtained in (B).

245

246 **Fig. 3.** ICLUST identifies distinct clustering in airline data. All scatterplots in the dataset were  
247 plotted and clustered using (A) correlation strength alone and (B) image 4096-component feature  
248 vectors. (C) Average image in each cluster as determined by correlation strength-based  
249 clustering, corresponding to the dendrogram in (A). (D) Average image in each cluster according  
250 to visual similarity clustering via ICLUST. (E). Principal Coordinate Analysis (PCA) of the  
251 scatterplots based on the 4096-component feature vector for each image with colors pertaining to  
252 the clustering obtained in (B). (F) Examples of scatterplots with similar correlation size but  
253 different visual shape. (G) Example of correlations with similar shape but different correlation  
254 strength.

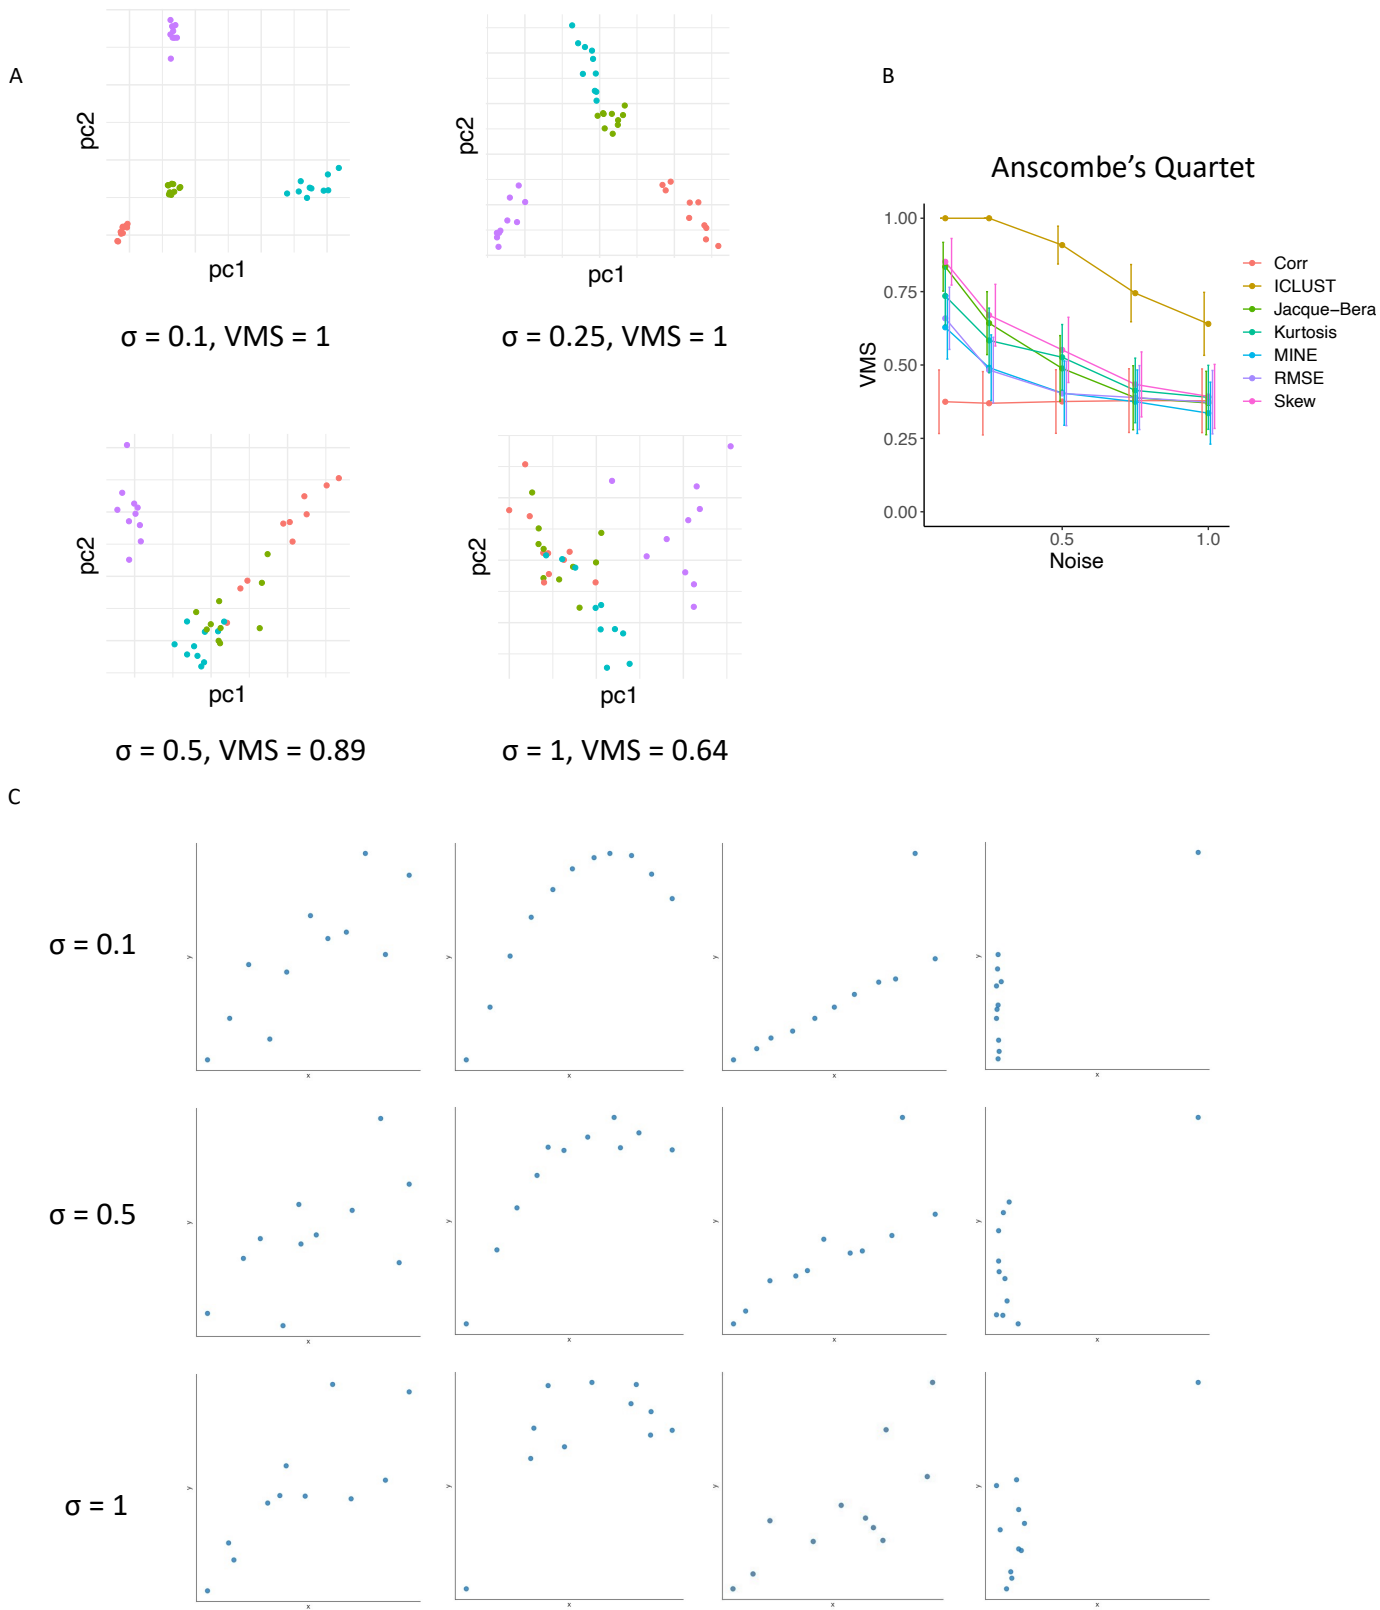

**Figure 1**

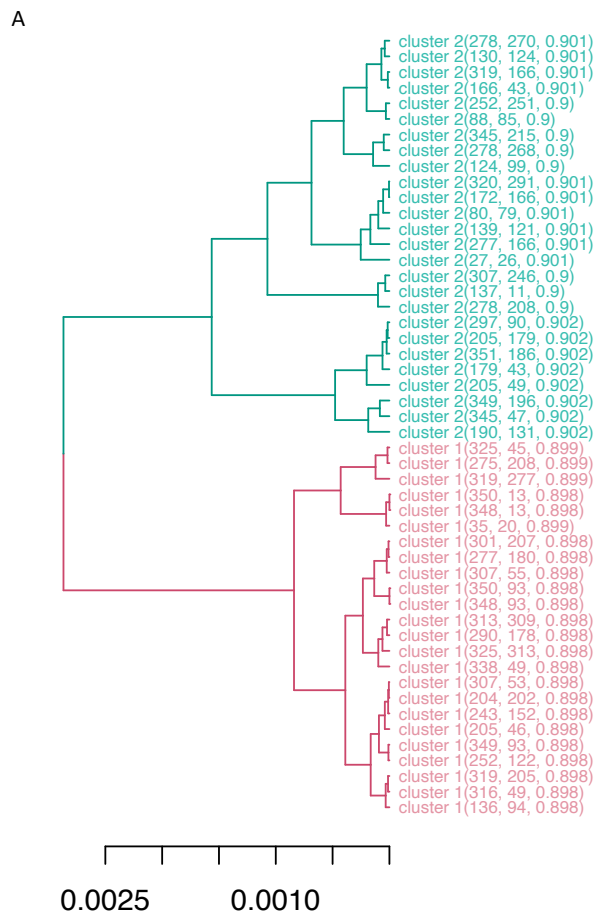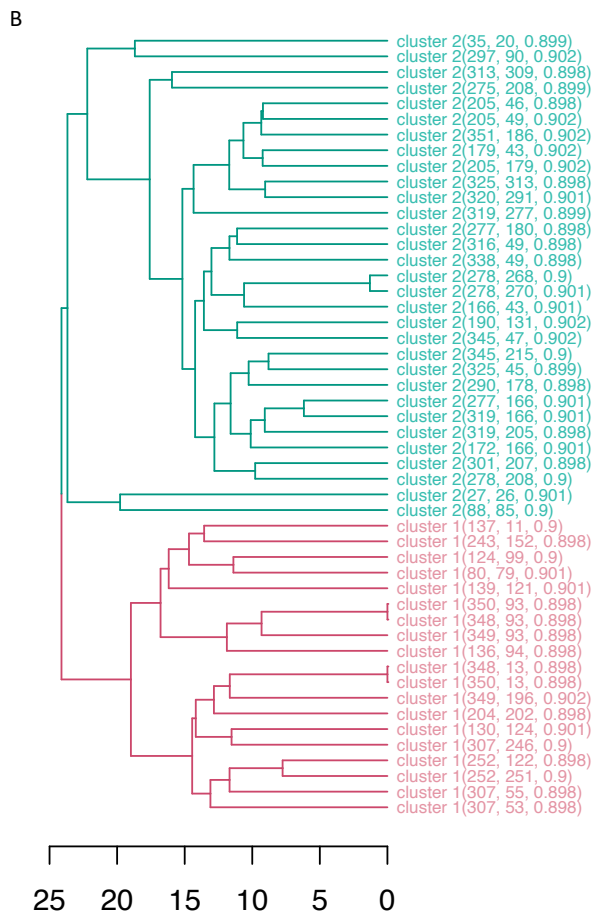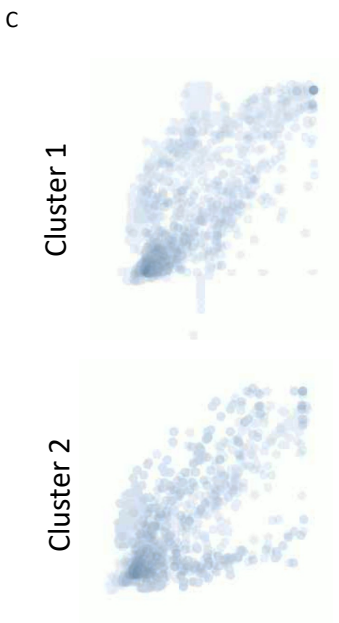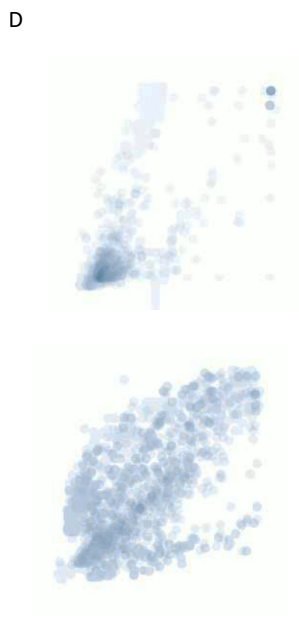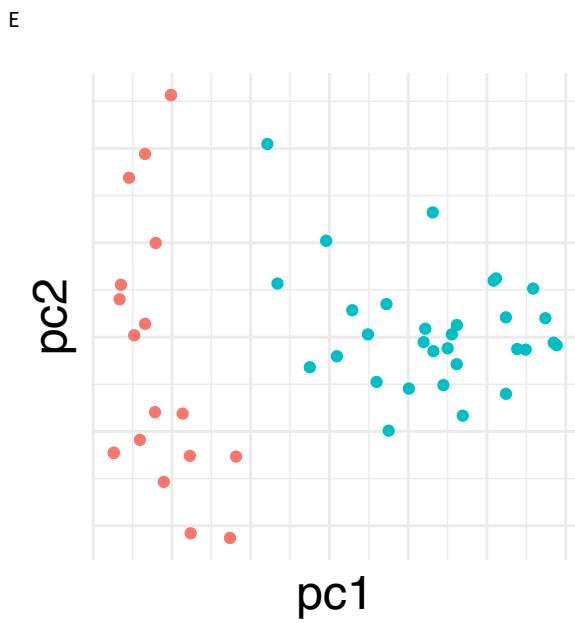

**Figure 2**

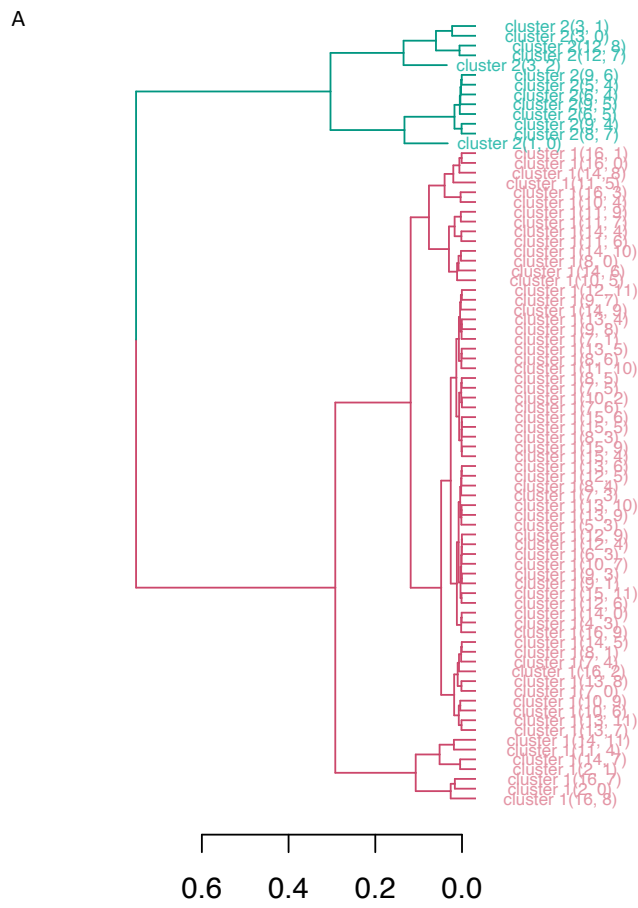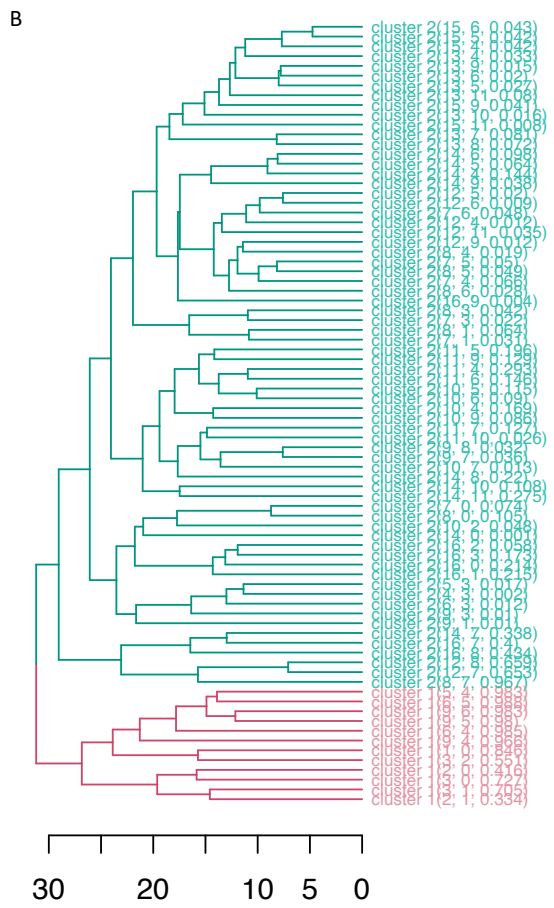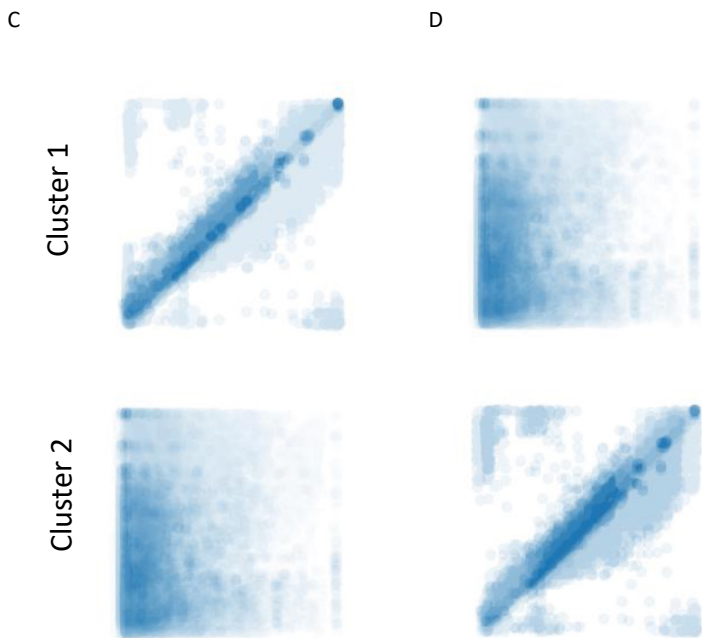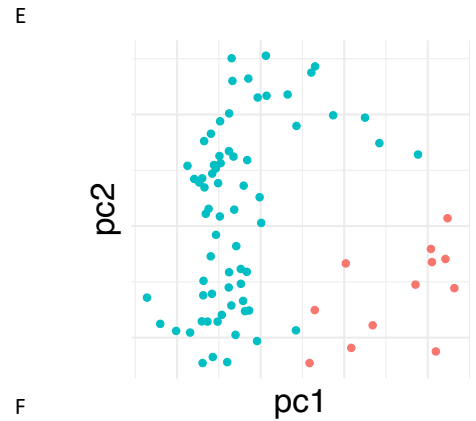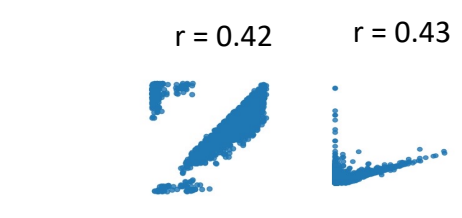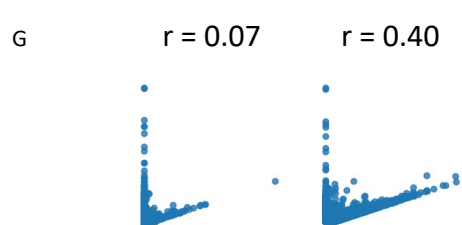

**Figure 3**
